# Supplementary material
Source: PubMed Central journal article supplement (PMC10102148)
Supplement: 10067_2023_6522_MOESM2_ESM.pdf [file 10067_2023_6522_MOESM2_ESM.pdf]

# **Assessment of Quality and Reliability of YouTube Videos for Patient and Physician Education on Inflammatory Myositis**

Clinical Rheumatology

## **Author names**

Mrudula Joshi <sup>1</sup>

R Naveen <sup>3</sup>

Kshitij Jagtap <sup>2</sup>

Ria Gupta <sup>1</sup>

Vikas Agarwal <sup>3</sup>

Rohit Aggarwal <sup>4</sup>

Ashish Goel <sup>5</sup>

Latika Gupta\* <sup>3,6,7,8</sup>

## **Correspondence to:**

Dr. Latika Gupta\*

Dept of Rheumatology, Royal Wolverhampton Hospitals NHS Trust, Wolverhampton, WV10 0QP, United Kingdom. ORCID ID: 0000-0003-2753-2990

Email- drlatikagupta@gmail.com

+4401902 307999

**Online Resource 2** Analyses by source category

| Video characteristics                   | Hospital (N=62) | Group practice or Physician (N=79) | Nonmedical independent user (N=54) | Nonmedical media organization (N=37) | Professional medical society/Patient support group (N=191) | Pharmaceutical company (N=30) |
|-----------------------------------------|-----------------|------------------------------------|------------------------------------|--------------------------------------|------------------------------------------------------------|-------------------------------|
| <i>Usefulness, n (%)</i>                |                 |                                    |                                    |                                      |                                                            |                               |
| Useful                                  | 53 (85.4)       | 74 (93.6)                          | 14 (25.9)                          | 27 (72.9)                            | 158 (82.7)                                                 | 11 (36.6)                     |
| Not very useful                         | 1 (1.6)         | 1 (1.2)                            | 0 (0)                              | 3 (8.1)                              | 3 (1.5)                                                    | 0 (0)                         |
| Patient experience                      | 8 (12.9)        | 4 (5.0)                            | 40 (74.0)                          | 7 (18.9)                             | 30 (15.7)                                                  | 19 (63.3)                     |
| <i>Content category, n (%)</i>          |                 |                                    |                                    |                                      |                                                            |                               |
| Treatment                               | 22 (35.4)       | 44 (55.7)                          | 4 (7.4)                            | 11 (29.7)                            | 56 (29.3)                                                  | 6 (20.0)                      |
| Etiology                                | 3 (4.8)         | 15 (18.9)                          | 4 (7.4)                            | 0 (0)                                | 7 (3.6)                                                    | 1 (3.3)                       |
| Diagnosis                               | 20 (32.2)       | 50 (63.2)                          | 4 (7.4)                            | 12 (32.4)                            | 51 (26.7)                                                  | 0 (0)                         |
| Signs & Symptoms                        | 17 (27.4)       | 53 (67.0)                          | 6 (11.1)                           | 10 (27.0)                            | 38 (19.9)                                                  | 1 (3.3)                       |
| Ancillary care                          | 1 (1.6)         | 0 (0)                              | 3 (5.5)                            | 0 (0)                                | 4 (2.1)                                                    | 0 (0)                         |
| Diet                                    | 3 (4.8)         | 0 (0)                              | 0 (0)                              | 0 (0)                                | 5 (2.6)                                                    | 0 (0)                         |
| Physiotherapy                           | 1 (1.6)         | 0 (0)                              | 0 (0)                              | 0 (0)                                | 21 (10.9)                                                  | 0 (0)                         |
| ADRs                                    | 2 (3.2)         | 0 (0)                              | 0 (0)                              | 0 (0)                                | 5 (2.6)                                                    | 0 (0)                         |
| Physical examination                    | 2 (3.2)         | 2 (2.5)                            | 1 (1.8)                            | 0 (0)                                | 2 (1.0)                                                    | 0 (0)                         |
| Risk factors                            | 2 (3.2)         | 1 (1.2)                            | 0 (0)                              | 2 (5.4)                              | 4 (2.1)                                                    | 0 (0)                         |
| Pathogenesis                            | 5 (8.0)         | 24 (30.3)                          | 0 (0)                              | 1 (2.7)                              | 16 (8.3)                                                   | 1 (3.3)                       |
| Patient experience                      | 8 (12.9)        | 4 (5.0)                            | 36 (66.6)                          | 6 (16.2)                             | 30 (15.7)                                                  | 19 (63.3)                     |
| Miscellaneous                           | 21 (33.8)       | 12 (15.1)                          | 11 (20.3)                          | 12 (32.4)                            | 80 (41.8)                                                  | 2 (6.6)                       |
| <i>Intended audience, n(%)</i>          |                 |                                    |                                    |                                      |                                                            |                               |
| Anyone/General public                   | 12 (19.3)       | 5 (6.3)                            | 0 (0)                              | 1 (2.7)                              | 5 (2.6)                                                    | 1 (3.3)                       |
| Specifically for patients               | 38 (61.2)       | 19 (24.0)                          | 52 (96.3)                          | 21 (56.7)                            | 164 (85.8)                                                 | 30 (100)                      |
| Healthcare providers including students | 50 (80.6)       | 75 (94.9)                          | 5 (9.2)                            | 27 (72.9)                            | 145 (75.9)                                                 | 11 (36.6)                     |
| Caregivers                              | 7 (11.2)        | 1 (1.2)                            | 18 (33.3)                          | 7 (18.9)                             | 40 (20.9)                                                  | 2 (6.6)                       |
| <i>Training level, n(%)</i>             |                 |                                    |                                    |                                      |                                                            |                               |
| Formal medical training                 | 54 (87.1)       | 76 (96.2)                          | 3 (5.5)                            | 22 (59.4)                            | 150 (78.5)                                                 | 11 (36.6)                     |
| No formal medical training              | 8 (12.9)        | 3 (3.8)                            | 51 (94.4)                          | 15 (40.5)                            | 41 (21.4)                                                  | 19 (63.3)                     |
| <i>Speciality of speaker, n(%)</i>      |                 |                                    |                                    |                                      |                                                            |                               |
| Rheumatologist                          | 10 (16.1)       | 11 (13.9)                          | 0 (0)                              | 3 (8.1)                              | 49 (25.6)                                                  | 1 (3.3)                       |
| Dermatologist                           | 2 (3.2)         | 0 (0)                              | 0 (0)                              | 0 (0)                                | 5 (2.6)                                                    | 6 (20)                        |
| Neurologist                             | 14 (22.5)       | 4 (5.0)                            | 1 (1.8)                            | 6 (16.2)                             | 31 (16.2)                                                  | 0 (0)                         |
| GP                                      | 6 (9.6)         | 5 (6.3)                            | 0 (0)                              | 0 (0)                                | 1 (0.5)                                                    | 0 (0)                         |
| Others/Unknown                          | 22 (35.4)       | 56 (70.8)                          | 2 (3.7)                            | 13 (35.1)                            | 61 (31.9)                                                  | 4 (13.3)                      |
