# Supplementary material
Source: PubMed Central journal article supplement (PMC10102148)
Supplement: 10067_2023_6522_MOESM3_ESM.pdf [file 10067_2023_6522_MOESM3_ESM.pdf]

# Assessment of Quality and Reliability of YouTube Videos for Patient and Physician Education on Inflammatory Myositis

Clinical Rheumatology

## Author names

Mrudula Joshi <sup>1</sup>

R Naveen <sup>3</sup>

Kshitij Jagtap <sup>2</sup>

Ria Gupta <sup>1</sup>

Vikas Agarwal <sup>3</sup>

Rohit Aggarwal <sup>4</sup>

Ashish Goel <sup>5</sup>

Latika Gupta\* <sup>3,6,7,8</sup>

## Correspondence to:

Dr. Latika Gupta\*

Dept of Rheumatology, Royal Wolverhampton Hospitals NHS Trust, Wolverhampton, WV10 0QP, United Kingdom. ORCID ID: 0000-0003-2753-2990

Email- drlatikagupta@gmail.com

+4401902 307999

**Online Resource 3** Analyses of video characteristics by Score based usefulness (Useful video has mDISCERN >4 or GQS >4 or JAMA >3)

| Video characteristics                   | Useful (N=304)   | Not very useful (N=41) | OR (95%CI)    | P value |
|-----------------------------------------|------------------|------------------------|---------------|---------|
| <i>Audience interaction parameters</i>  |                  |                        |               |         |
| No. of views                            | 921 (296-3146)   | 579 (160-4408)         |               | 0.526   |
| Subscribers                             | 4110 (879-4110)  | 8330 (468-28200)       |               | 0.062   |
| Days since upload                       | 895 (471-1530)   | 1245 (453-2234)        |               | 0.167   |
| Viewing rate                            | 116 (45-307)     | 76 (32-299)            |               | 0.325   |
| Number of likes                         | 12 (4-34)        | 7 (2-29)               |               | 0.130   |
| Number of dislikes                      | 0 (0-1)          | 0 (0-4.5)              |               | 0.139   |
| Interaction index                       | 1 (1-2)          | 1 (0-2)                |               | 0.037   |
| Number of comments                      | 0 (0-3)          | 1 (0-3)                |               | 0.857   |
| Daily viewership                        | 90 [(-457)-2013] | -50 [(-743)-1822]      |               | 0.500   |
| <i>Intended audience, n (%)</i>         |                  |                        |               |         |
| Anyone/General public                   | 17 (6)           | 2 (5)                  |               | 0.851   |
| Specifically for patients               | 198 (65)         | 21 (51)                |               | 0.082   |
| Healthcare providers including students | 270 (88)         | 38 (92)                |               | 0.453   |
| Caregivers                              | 46 (15)          | 7 (17)                 |               | 0.746   |
| <i>Content category, n (%)</i>          |                  |                        |               |         |
| Treatment                               | 120 (39)         | 19 (46)                |               | 0.400   |
| Etiology                                | 25 (8)           | 5 (12)                 |               | 0.397   |
| Diagnosis                               | 119 (39)         | 18 (44)                |               | 0.559   |
| Signs & Symptoms                        | 103 (34)         | 22 (53)                | 0.4 (0.2-0.8) | 0.013   |
| Ancillary care                          | 7 (2)            | 0 (0)                  |               | 0.326   |
| Diet                                    | 8 (3)            | 0 (0)                  |               | 0.293   |
| Physiotherapy                           | 20 (7)           | 0 (0)                  |               | 0.091   |
| ADRs                                    | 7 (2)            | 0 (0)                  |               | 0.326   |
| Physical examination                    | 6 (2)            | 0 (0)                  |               | 0.364   |
| Risk factors                            | 7 (2)            | 2 (5)                  |               | 0.331   |
| Pathogenesis                            | 40 (13)          | 7 (17)                 |               | 0.493   |

|                                                                                                                                                                                                                        |           |           |                |        |
|------------------------------------------------------------------------------------------------------------------------------------------------------------------------------------------------------------------------|-----------|-----------|----------------|--------|
| Patient experience                                                                                                                                                                                                     | 4 (1)     | 0 (0)     |                | 0.460  |
| Miscellaneous                                                                                                                                                                                                          | 115 (38)  | 11 (26)   |                | 0.170  |
| <i>Sources of upload, n (%)</i>                                                                                                                                                                                        |           |           |                |        |
| Hospital                                                                                                                                                                                                               | 51 (17)   | 3 (7)     |                | 0.130  |
| Group practice or Physician                                                                                                                                                                                            | 53 (17)   | 22 (54)   |                | <0.001 |
| Nonmedical independent user                                                                                                                                                                                            | 12 (4)    | 2 (5)     |                | 0.811  |
| Nonmedical media organization                                                                                                                                                                                          | 22 (7)    | 8 (20)    | 0.3 (0.13-0.7) | 0.012  |
| Professional medical society/Patient support group                                                                                                                                                                     | 159 (52)  | 2 (5)     | 21 (5-90)      | <0.001 |
| Pharmaceutical company                                                                                                                                                                                                 | 7 (2)     | 4 (10)    | 0.2 (0.06-0.7) | 0.019  |
| <i>Training level of the speaker, n (%)</i>                                                                                                                                                                            |           |           |                |        |
| Formal medical training                                                                                                                                                                                                | 284 (93)  | 30 (73)   | 11.5 (2.7-48)  | <0.001 |
| No formal medical training                                                                                                                                                                                             | 20 (7)    | 11 (27)   |                | <0.001 |
| <i>Speciality of speaker, n(%)</i>                                                                                                                                                                                     |           |           |                |        |
| Rheumatologist                                                                                                                                                                                                         | 74 (22)   | 0 (0)     |                | -      |
| Dermatologist                                                                                                                                                                                                          | 13 (4)    | 0 (0)     |                | -      |
| Neurologist                                                                                                                                                                                                            | 55 (16)   | 1 (13)    |                | 0.773  |
| GP                                                                                                                                                                                                                     | 11 (3)    | 0 (0)     |                | -      |
| Others/Unknown                                                                                                                                                                                                         | 154 (46)  | 3 (38)    |                | 0.646  |
| <i>Video Quality Metrics</i>                                                                                                                                                                                           |           |           |                |        |
| mDISCERN                                                                                                                                                                                                               | 4 (3-4)   | 2 (2-3)   |                | <0.001 |
| GQS                                                                                                                                                                                                                    | 4.5 (4-5) | 3 (3-3.5) |                | <0.001 |
| ADRs Adverse drug reactions, GP General Physician, GQS Global Quality Scale. P<0.05 is significant. Median (IQR) for Scale variables. Chi-square for categorical variables and Mann Whitney U test for scale variables |           |           |                |        |
